# Supplementary material for: An efficient down conversion luminescencent probe based on a NaGdF4:Eu3+/Ce3+ nanophosphor for chemical sensing of heavy metal ions (Cd2+, Pb2+ and Cr3+) in waste water
Source: Royal Society of Chemistry journal article supplement (doi:10.1039/c9nj04889h), 2019-12-23
Supplement: c9nj04889h1.pdf [file c9nj04889h1.pdf]

## (Supplementary Information)

### **Efficient Down Conversion Luminescent Probe Based on NaGdF<sub>4</sub>:Eu<sup>3+</sup>/Ce<sup>3+</sup> Nanophosphor for Chemical Sensing of Heavy Metal Ions (Cd<sup>2+</sup>, Pb<sup>2+</sup> and Cr<sup>3+</sup>) in Waste Water**

Lobzang Tashi<sup>a</sup>, Manesh Kumar<sup>a</sup>, Zaib-ul-Nisa<sup>a</sup>, Nargis Nelofar<sup>b</sup> and Haq Nawaz Sheikh<sup>a\*</sup>

<sup>a</sup>Department of Chemistry, University of Jammu, Baba Sahib Ambedkar Road, Jammu-180006, India

<sup>b</sup>Department of Zoology, Govt Degree College R. S. Pura, Jammu-181102, India

Email: [hnsheikh@rediffmail.com](mailto:hnsheikh@rediffmail.com)

### **Table of Contents**

| <b>CONTENTS</b>                                                                                                                               | <b>Pages</b>   |
|-----------------------------------------------------------------------------------------------------------------------------------------------|----------------|
| 1. FESEM Images of NaGdF <sub>4</sub> :Eu <sup>3+</sup> and NaGdF <sub>4</sub> :Eu <sup>3+</sup> /Ce <sup>3+</sup> .....                      | <b>S2-S3</b>   |
| 2. SEAD Patterns.....                                                                                                                         | <b>S4</b>      |
| 3. EDS spectra.....                                                                                                                           | <b>S5-S6</b>   |
| 4. FT-IR spectra.....                                                                                                                         | <b>S7-S8</b>   |
| 5. Solid state photoluminescence spectra NaGdF <sub>4</sub> :Eu <sup>3+</sup> and NaGdF <sub>4</sub> :Eu <sup>3+</sup> /Ce <sup>3+</sup> .... | <b>S9</b>      |
| 6. Photoluminescence spectra of NaGdF <sub>4</sub> :Eu <sup>3+</sup> /Ce <sup>3+</sup> in liquid phase.....                                   | <b>S10-S11</b> |
| 7. Life time decay curve.....                                                                                                                 | <b>S12-S13</b> |
| 8. Life time decay curve in presence of heavy metals ion.....                                                                                 | <b>S14</b>     |
| 9. EDS data Tables.....                                                                                                                       | <b>S15</b>     |

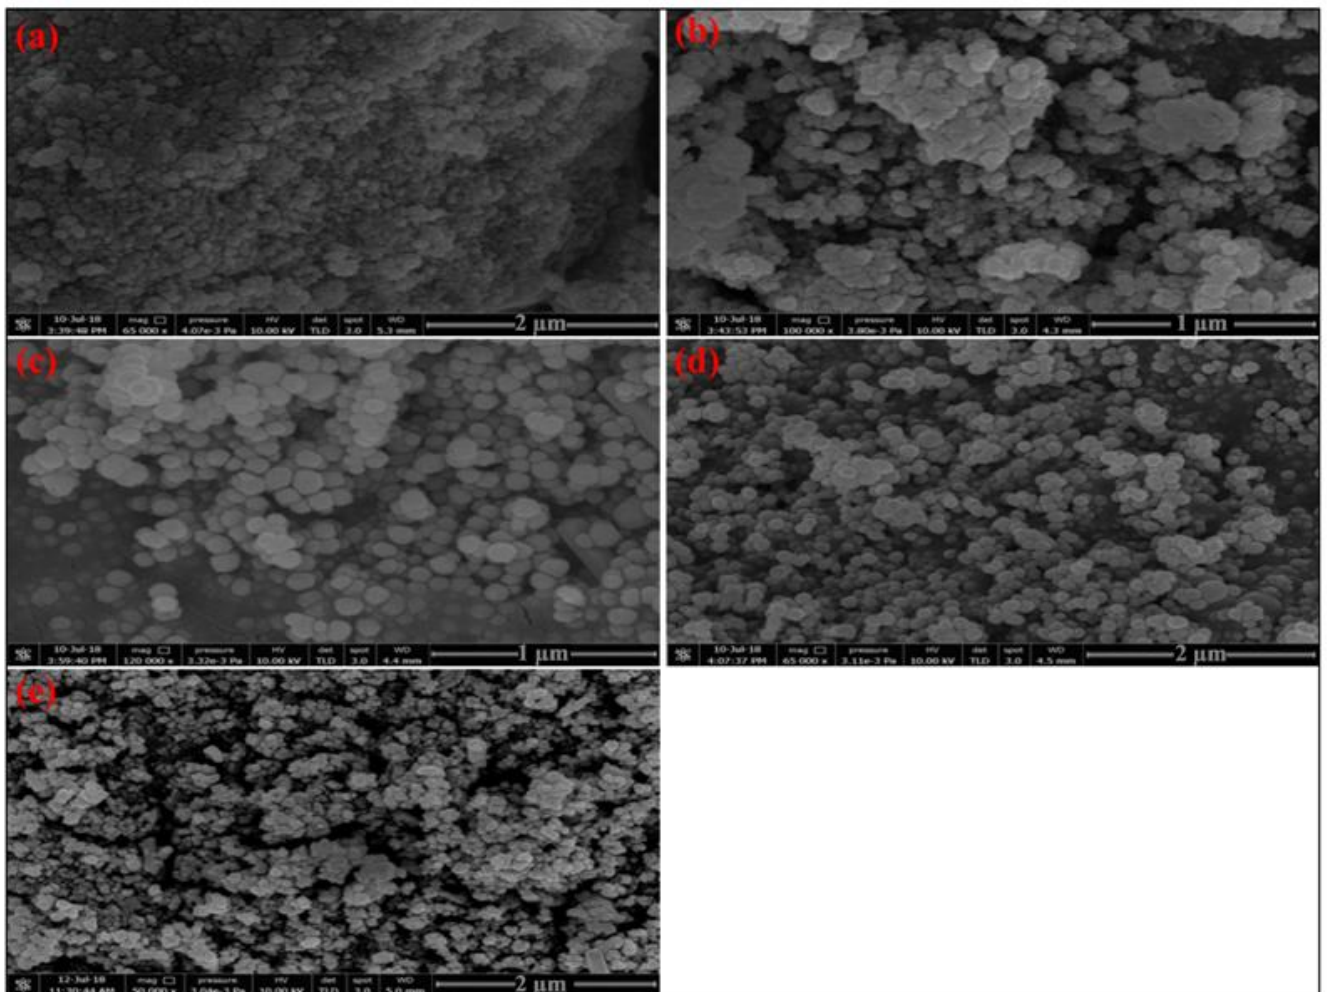

**Figure S1.** FESEM Images of NaGdF<sub>4</sub>:Eu<sup>3+</sup>; (a) 3 hrs (b) 6 hrs (c) 12 hrs (d) 18 hrs (e) 24 hrs.

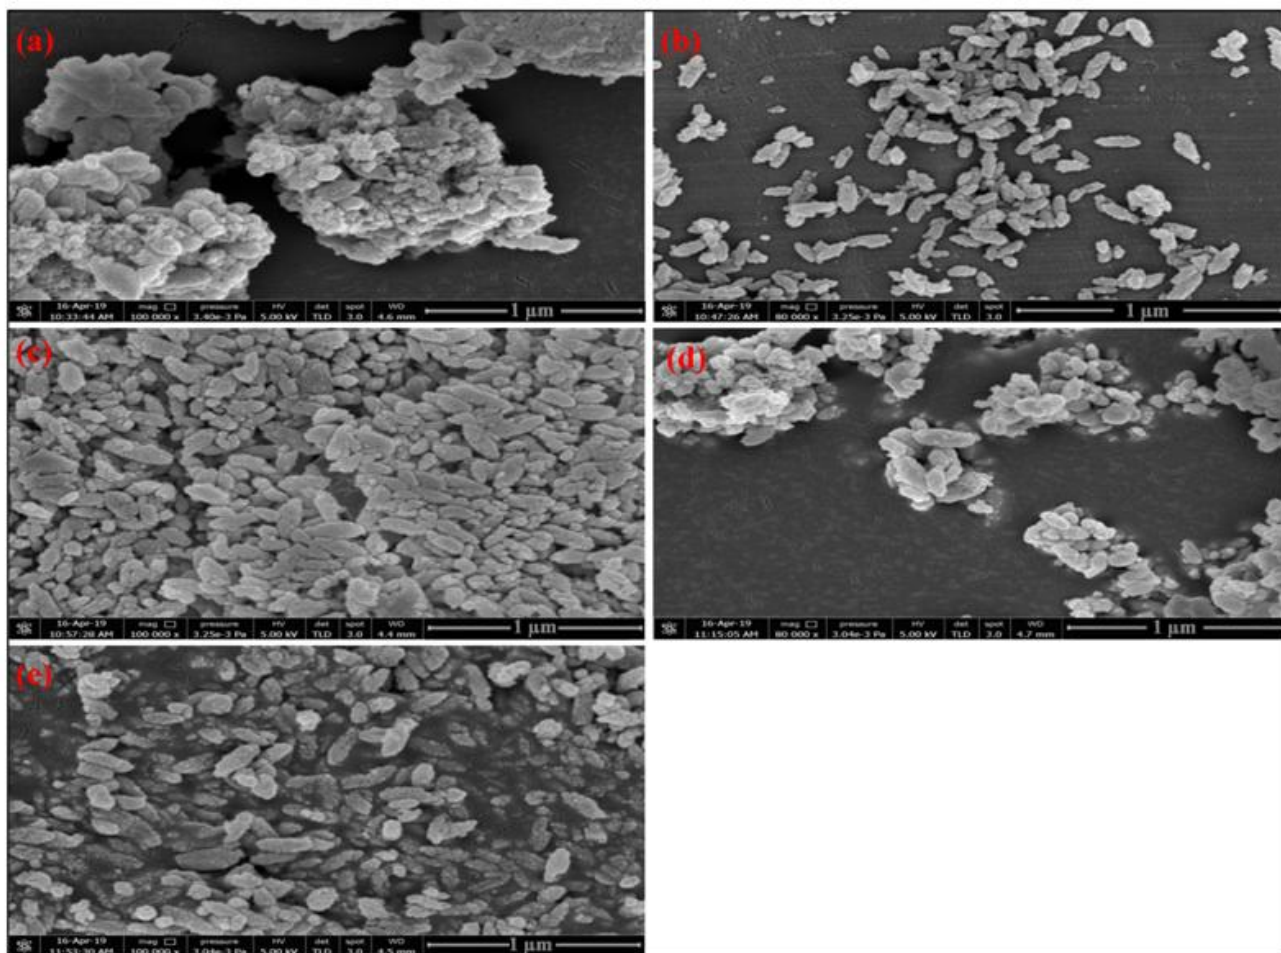

**Figure S2.** FESEM Images of NaGdF<sub>4</sub>: Eu<sup>3+</sup>/ Ce<sup>3+</sup>; (a) 3 hrs (b) 6 hrs (c) 12 hrs (d) 18 hrs (e) 24 hrs.

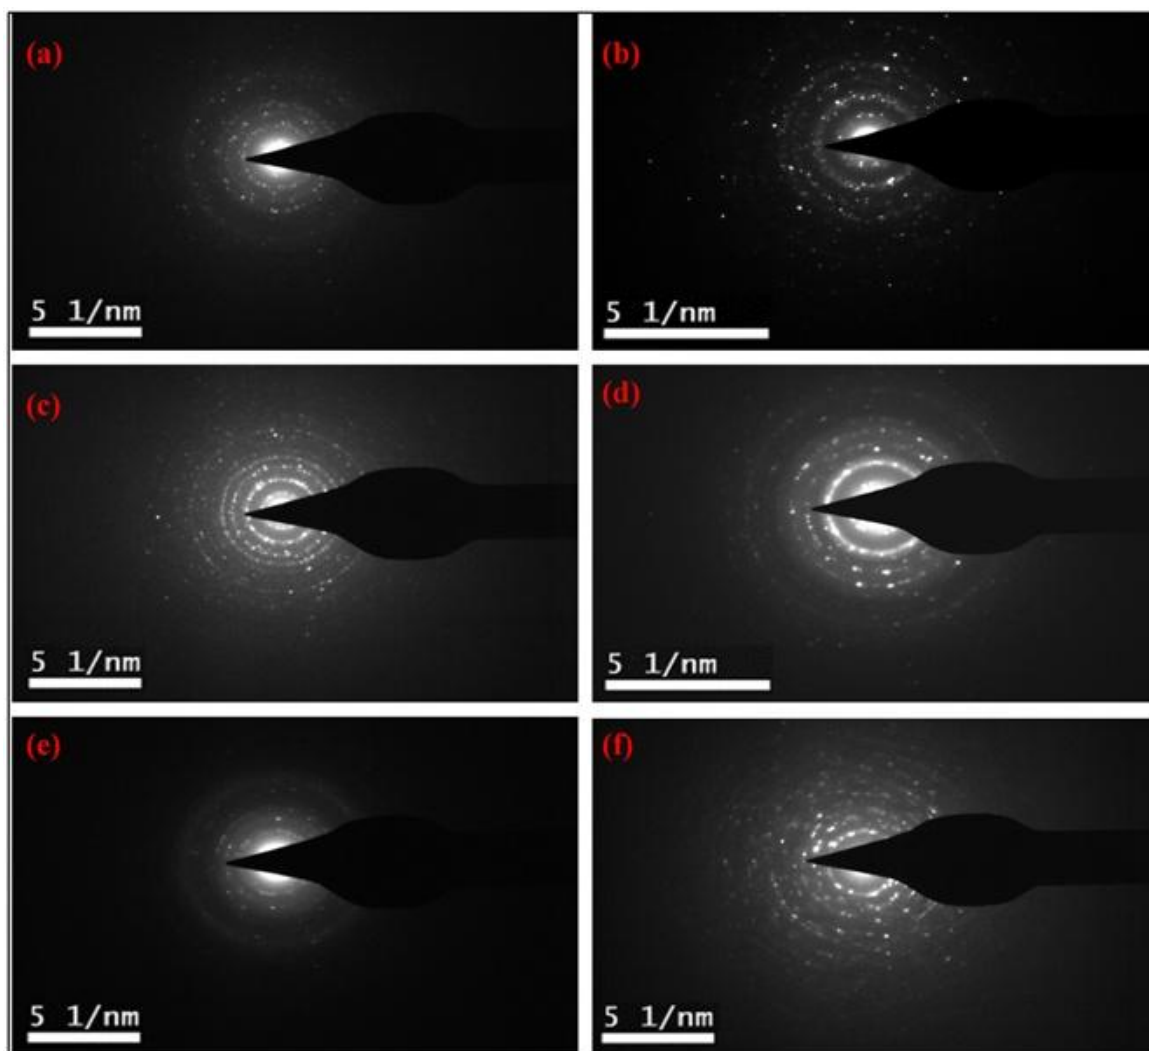

**Figure S3.** SEAD pattern of  $\text{NaGdF}_4:\text{Eu}^{3+}$ ; (a-d) and  $\text{NaGdF}_4:\text{Eu}^{3+}/\text{Ce}^{3+}$ ; (e and f) (a) 3 hrs (b) 6 hrs (c) 12 hrs (d) 18 hrs and (e) 3 hrs (f) 24 hrs.

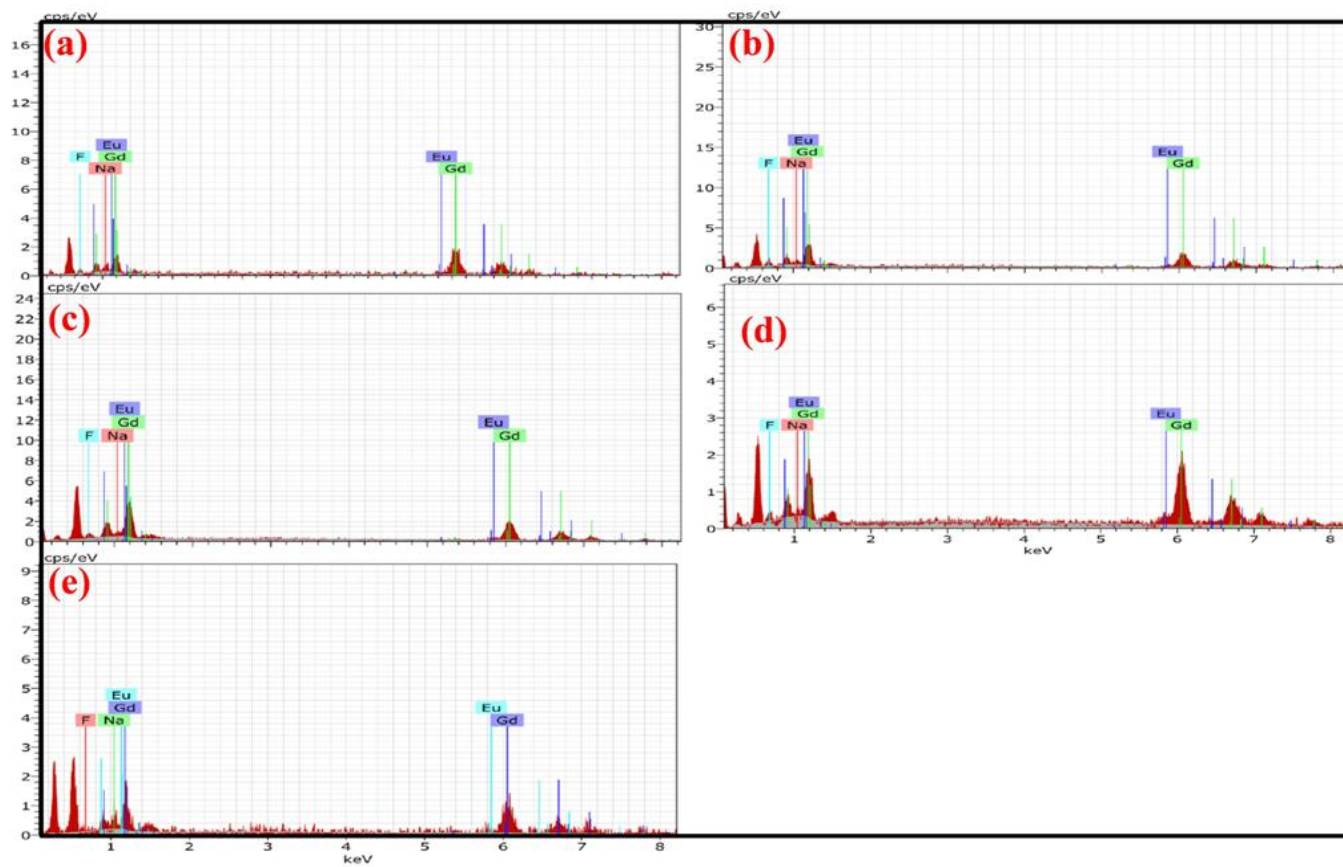

**Figure S4.** EDS spectra of  $\text{NaGdF}_4:\text{Eu}^{3+}$ ; (a) 3 hrs (b) 6 hrs (c) 12 hrs (d) 18 hrs and (e) 24 hrs.

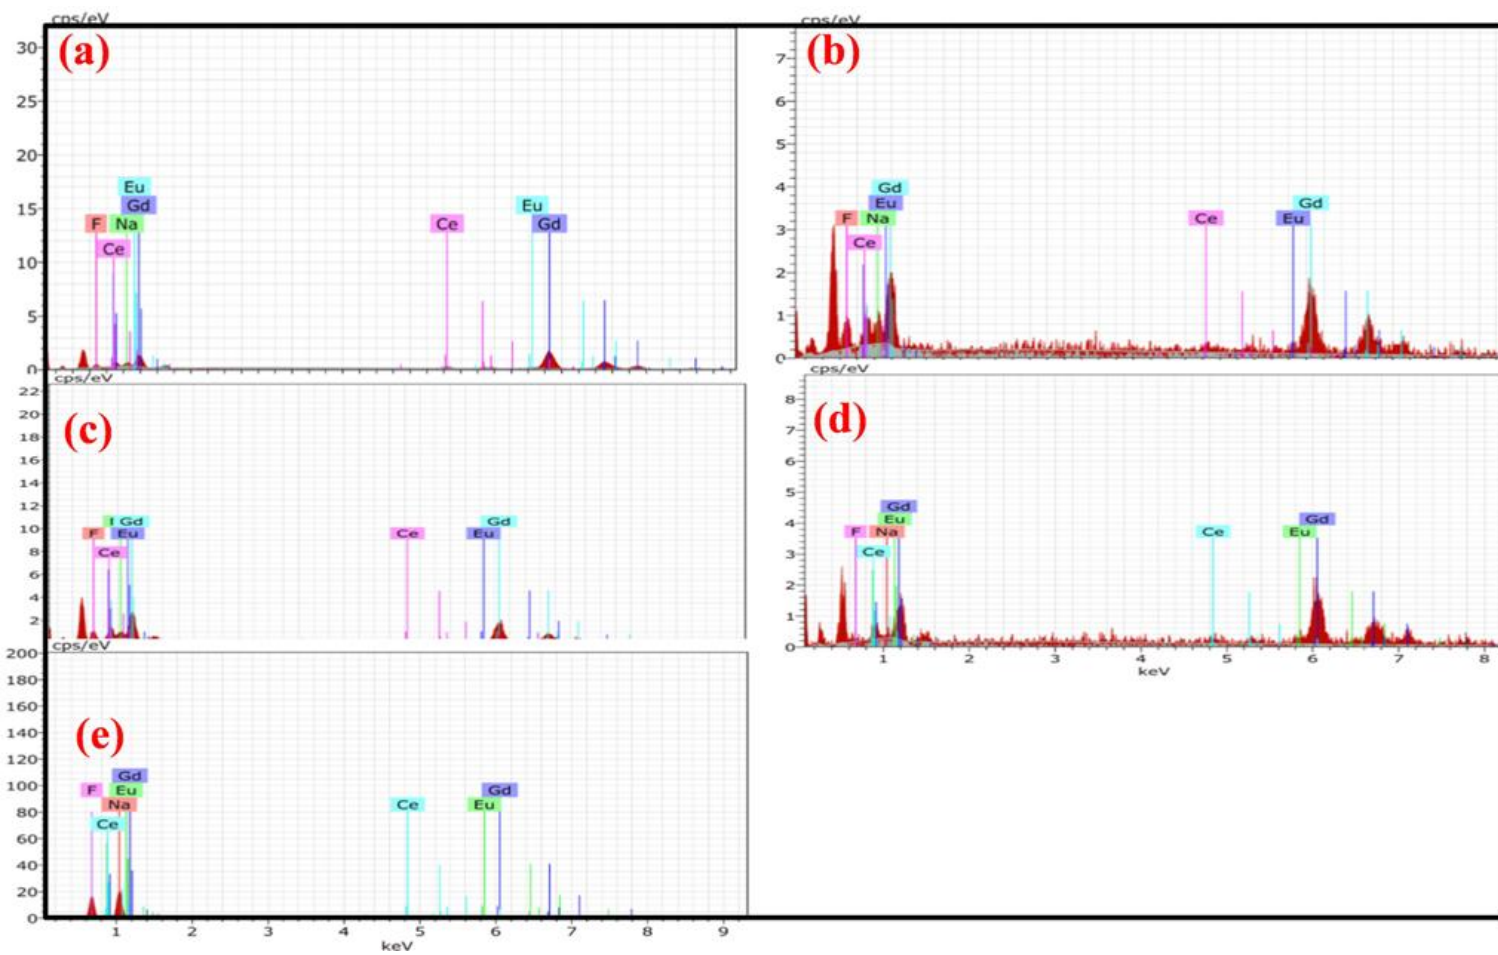

**Figure S5.** EDS spectra of as synthesized NaGdF<sub>4</sub>: Eu<sup>3+</sup>/Ce<sup>3+</sup>; (a) 3 hrs (b) 6hrs (c) 12hrs (d) 18 hrs (e) 24 hrs.

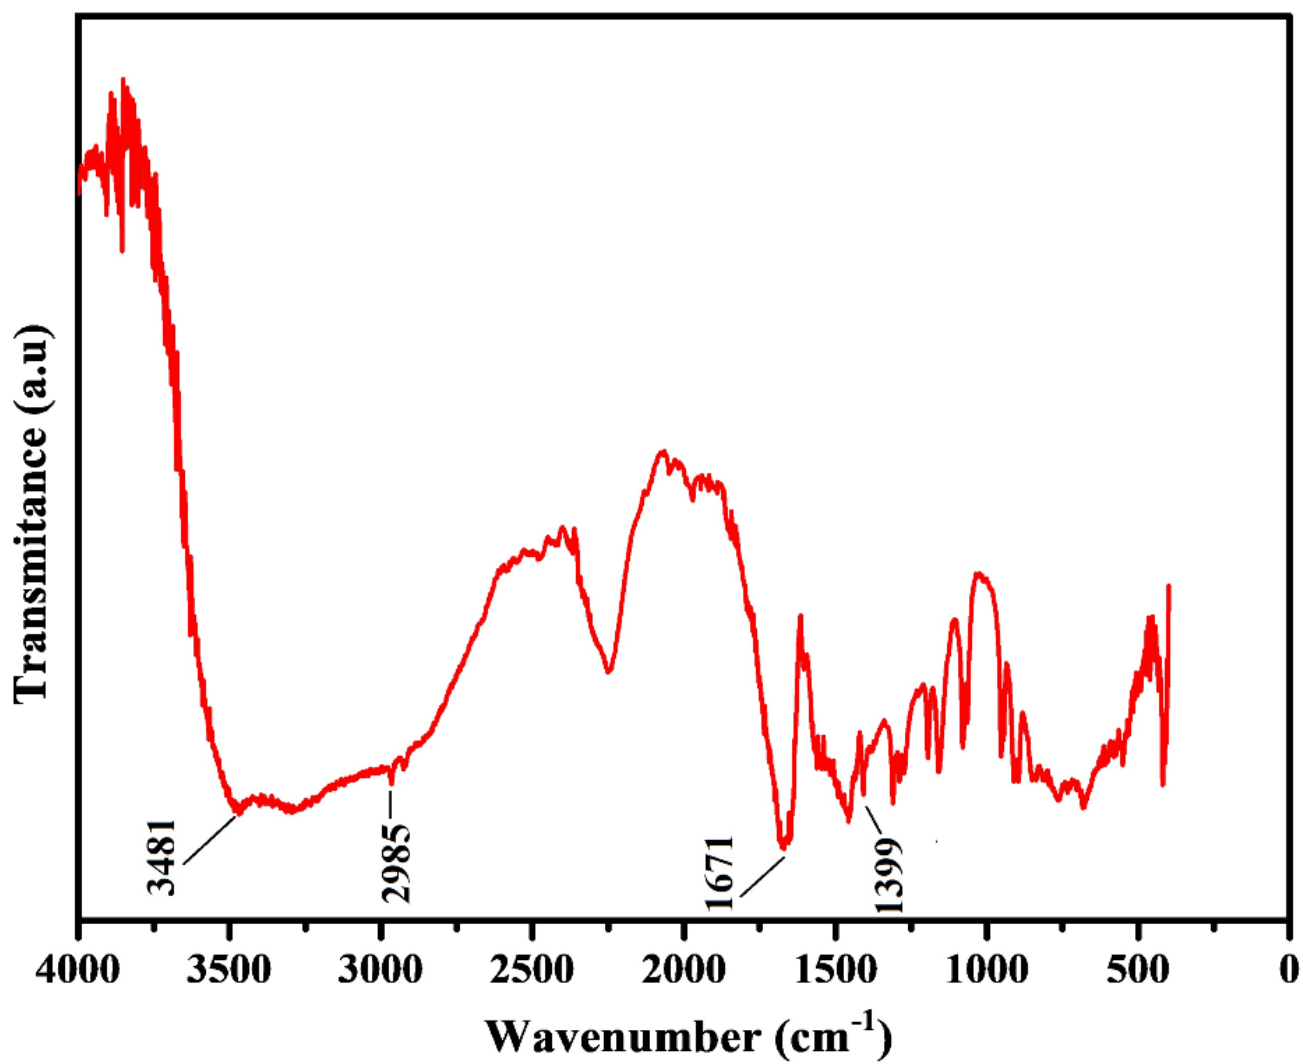

**Figure S6.** FTIR spectra of trisodium citrate (capping agent).

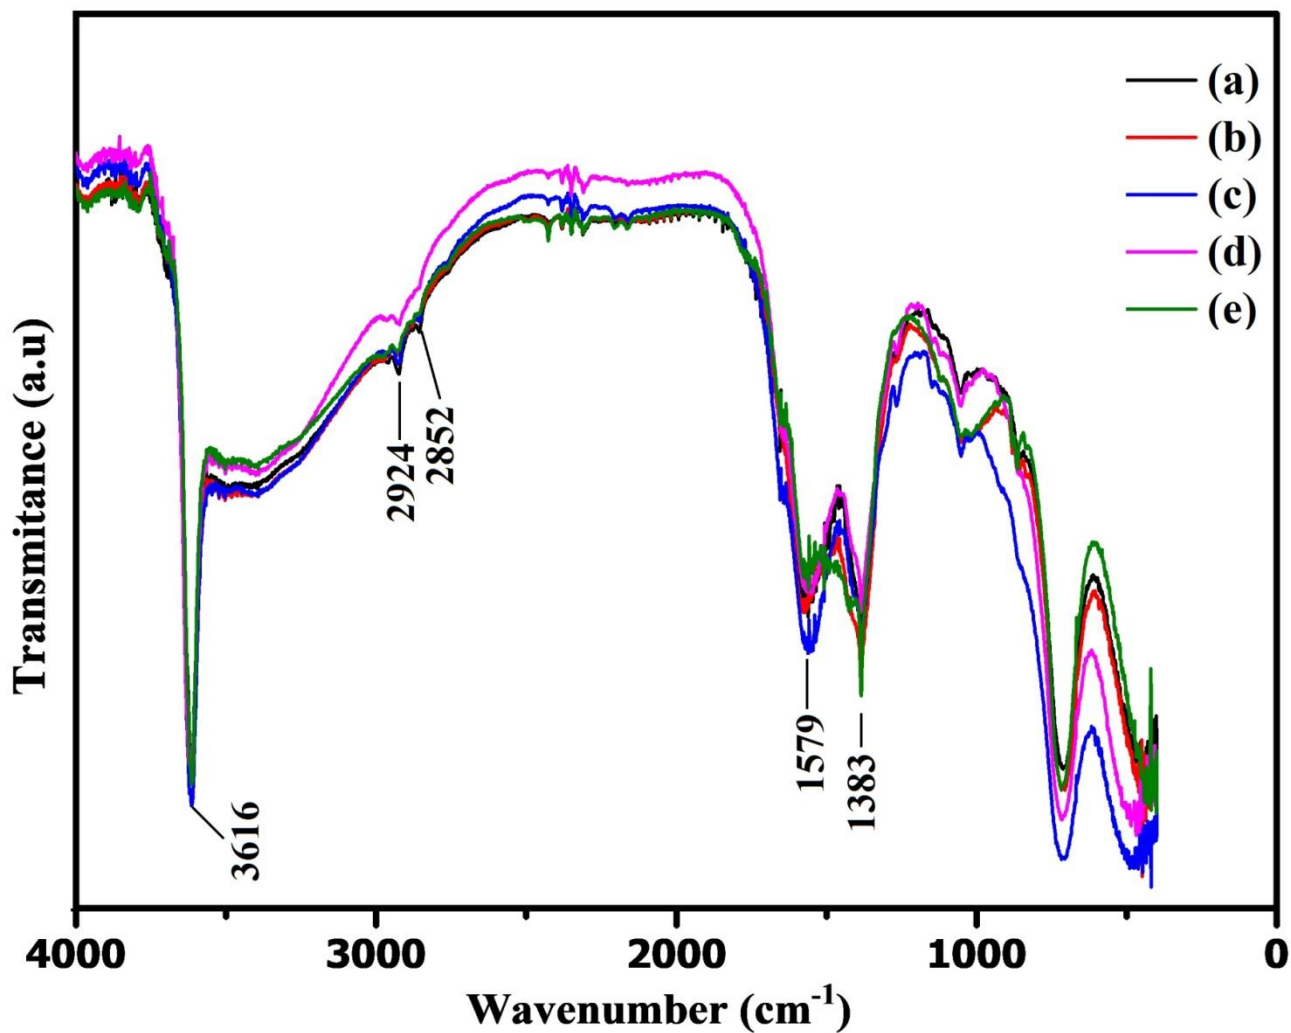

Figure S7. FTIR spectra of NaGdF<sub>4</sub>:Eu<sup>3+</sup>; (a) 3 hrs (b) 6 hrs (c) 12 hrs (d) 18 hrs (e) 24 hrs.



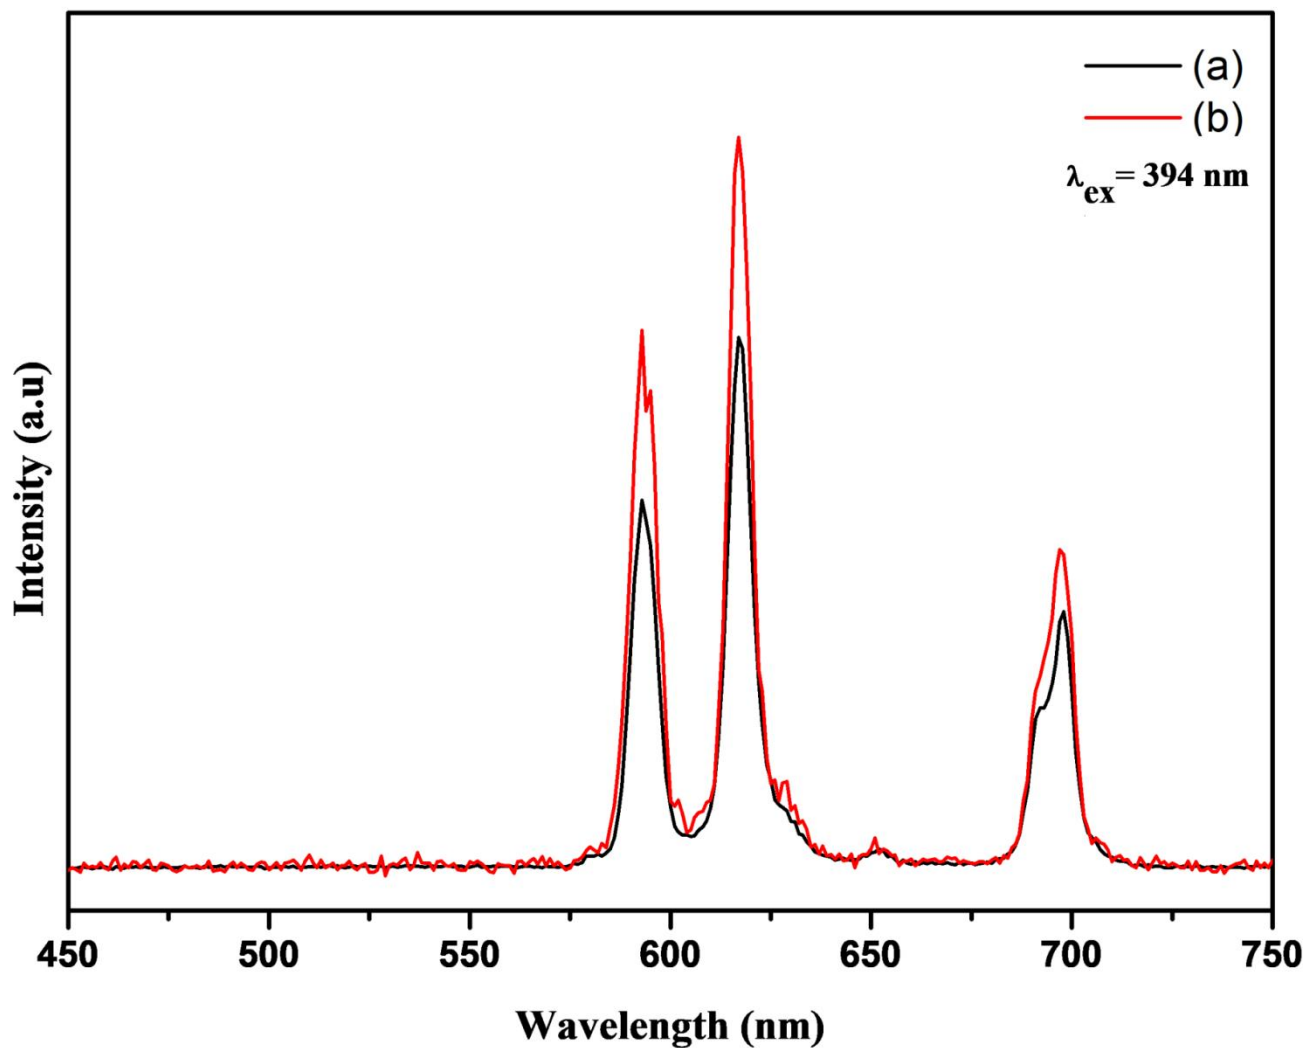

**Figure S8.** Solid state photoluminescence spectra of as synthesized nanostructures; (a)  $\text{NaGdF}_4:\text{Eu}^{3+}$  and (b)  $\text{NaGdF}_4:\text{Eu}^{3+}/\text{Ce}^{3+}$

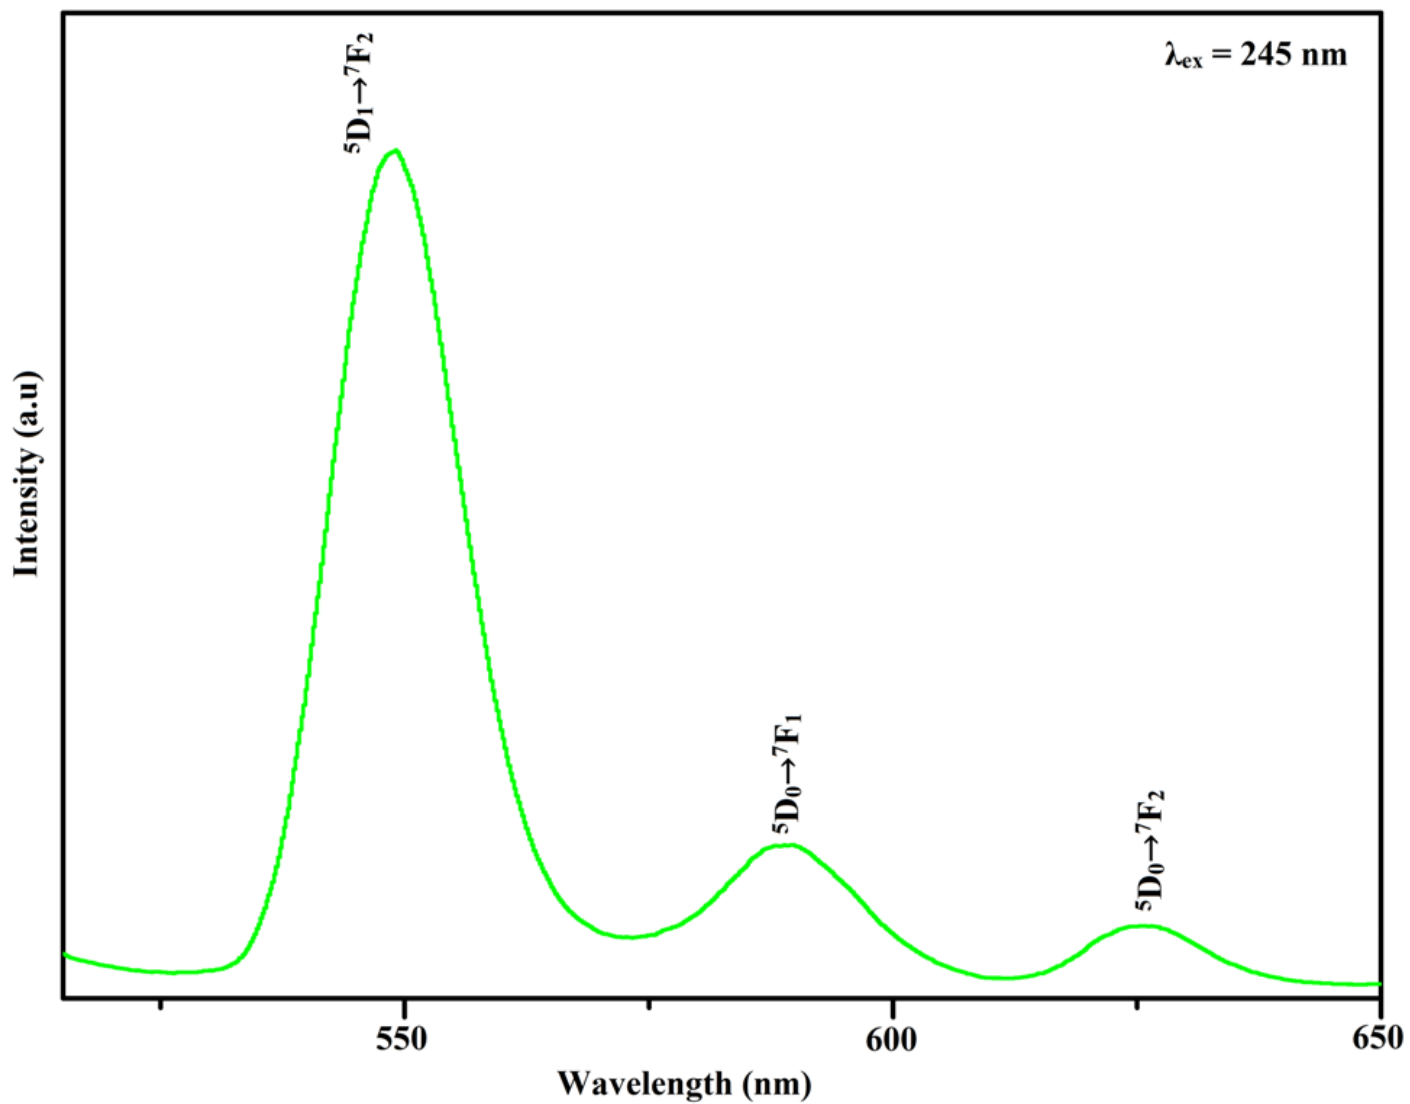

**Figure S9.** Photoluminescence spectra of NaGdF<sub>4</sub>:Eu<sup>3+</sup>/Ce<sup>3+</sup> on exciting at 245 nm

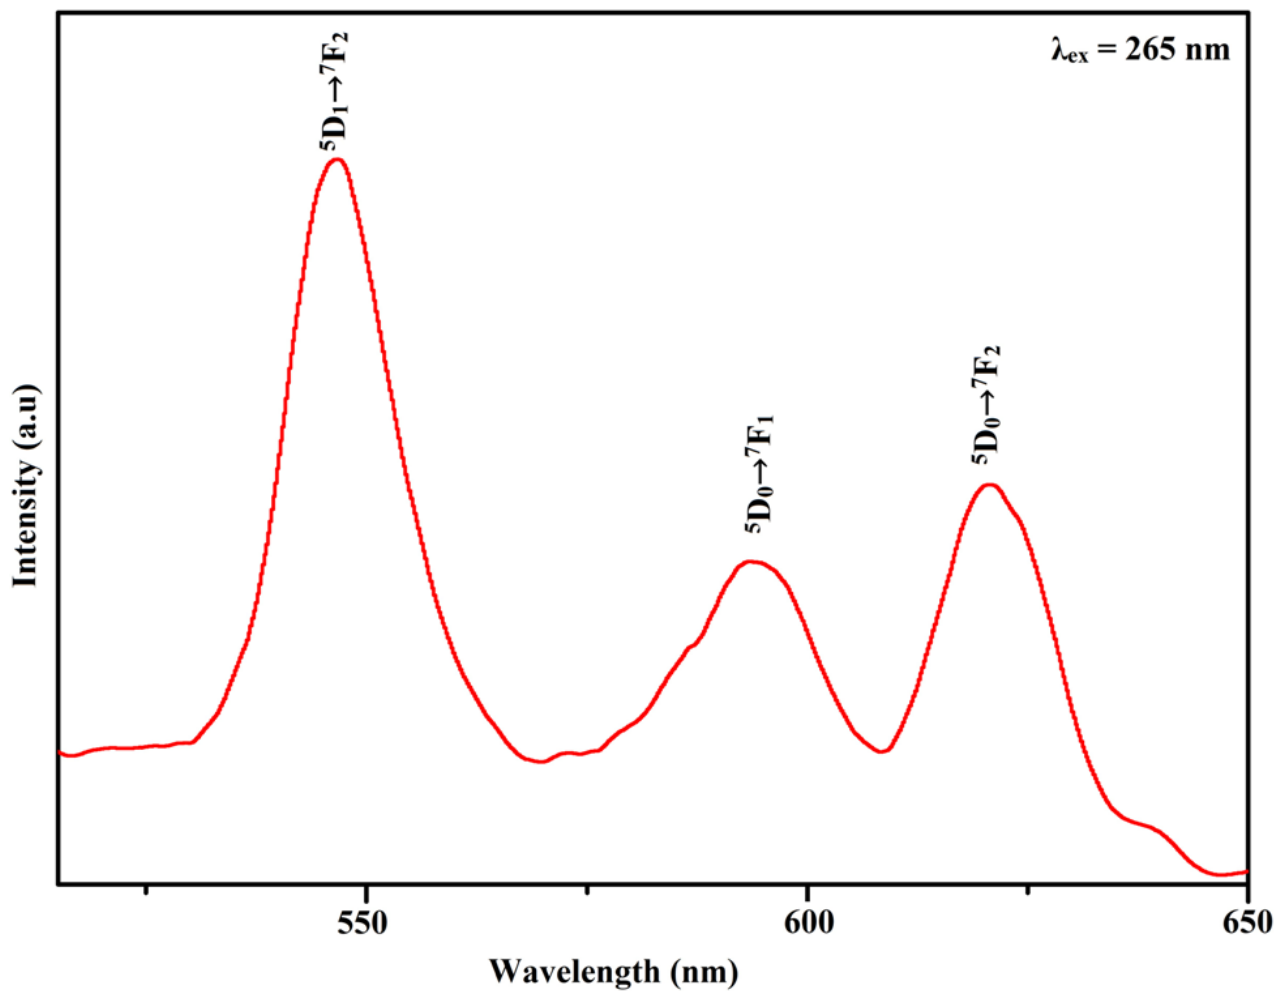

**Figure S10.** Photoluminescence spectra of NaGdF<sub>4</sub>:Eu<sup>3+</sup>/Ce<sup>3+</sup> on exciting at 265 nm

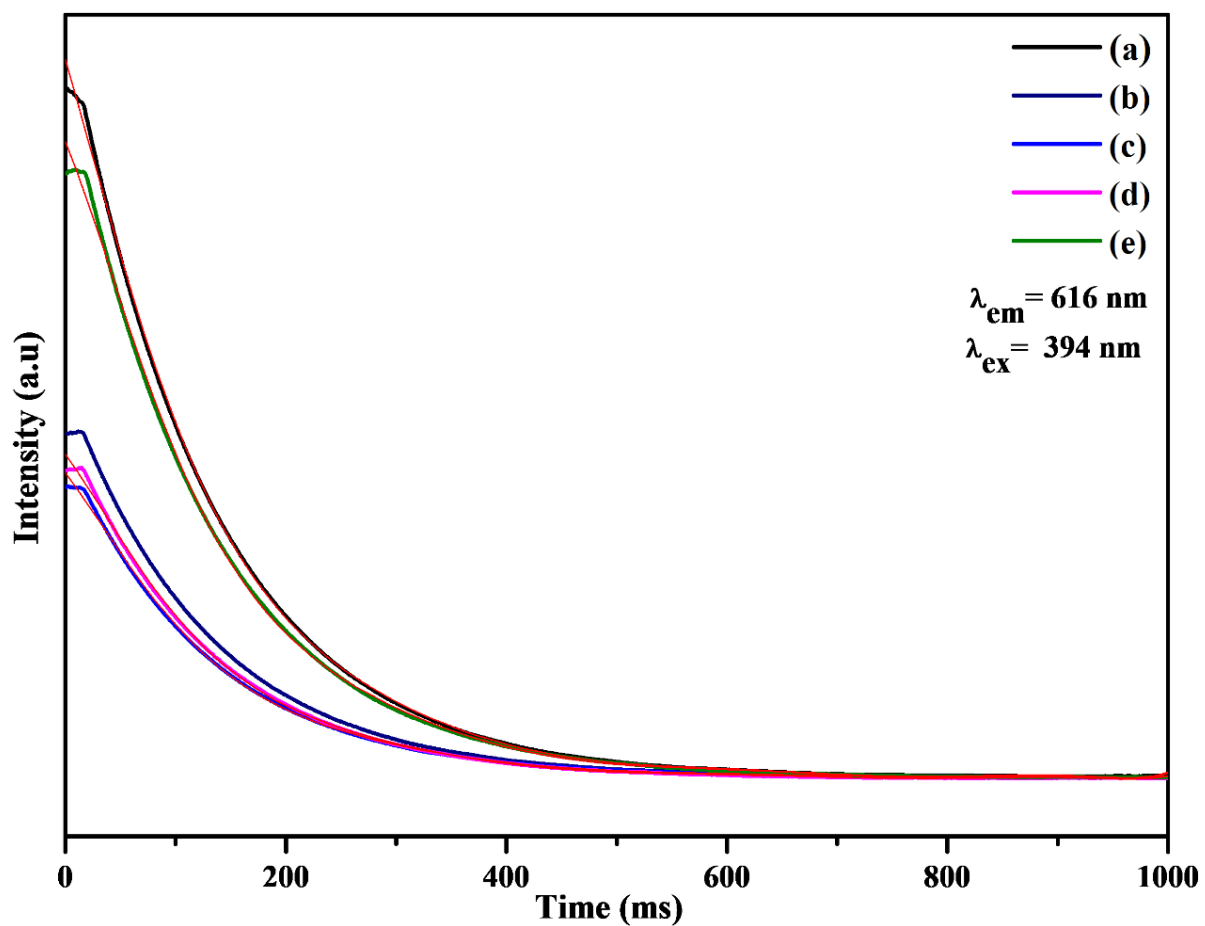

**Figure S11.** photoluminescence decay curves of NaGdF<sub>4</sub>: Eu<sup>3+</sup>/Ce<sup>3+</sup>; (a) 3 hrs (b) 6 hrs (c) 12 hrs (d) 18 hrs (e) 24 hrs

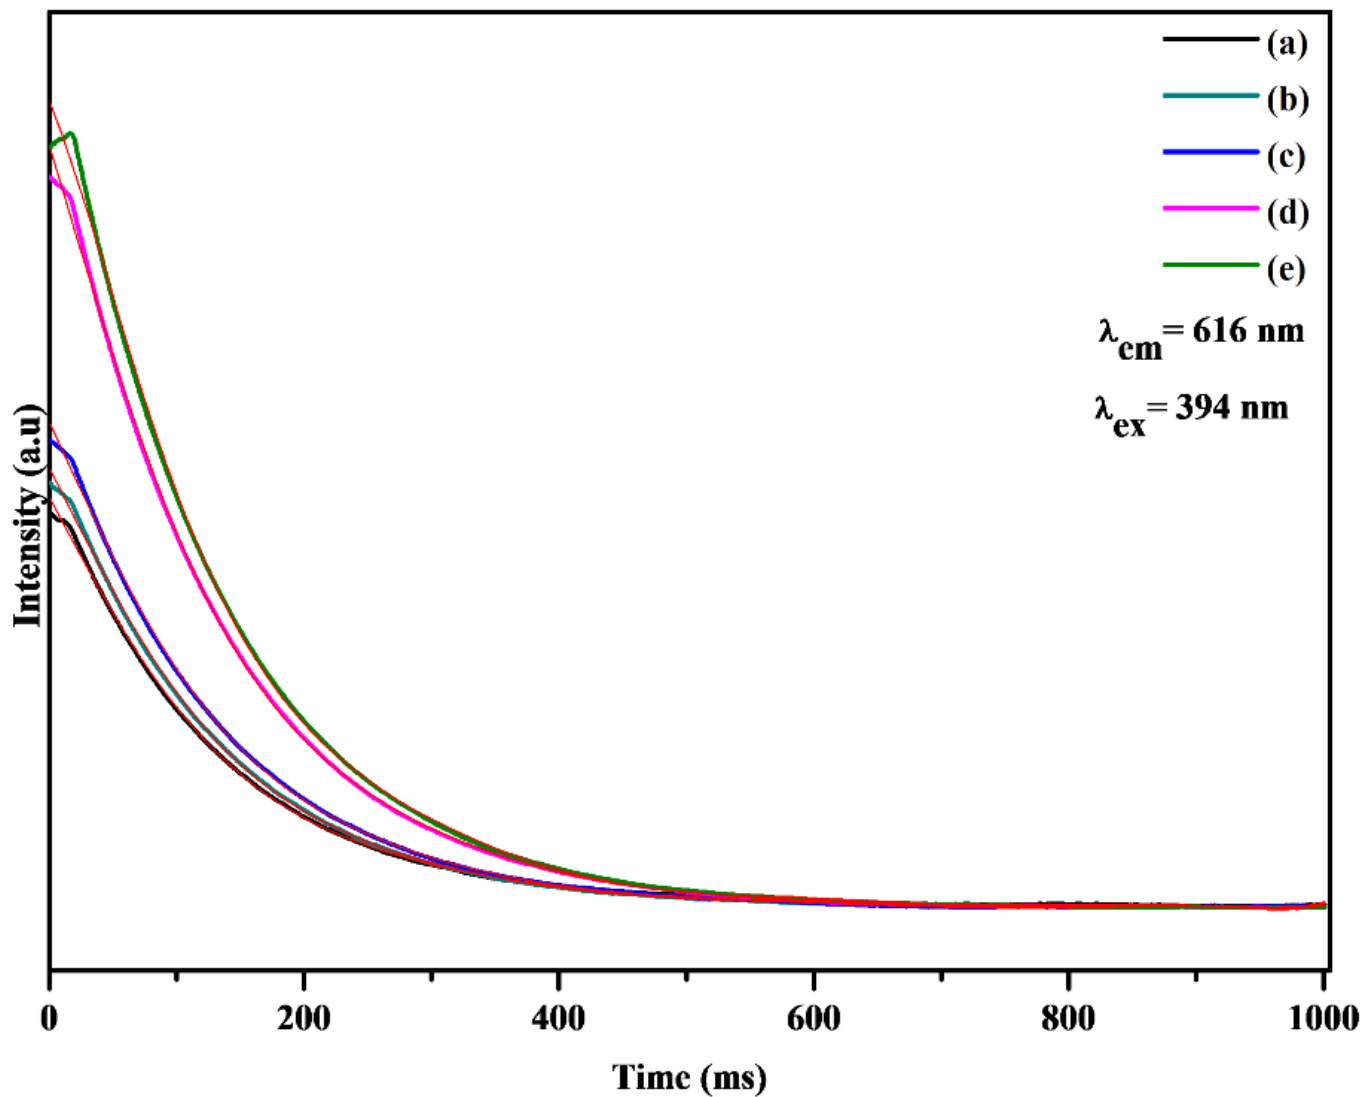

**Figure S12.** photoluminescence decay curves of NaGdF<sub>4</sub>: Eu<sup>3+</sup>/Ce<sup>3+</sup>; (a) 3 hrs (b) 6 hrs (c) 12 hrs (d) 18 hrs (e) 24 hrs

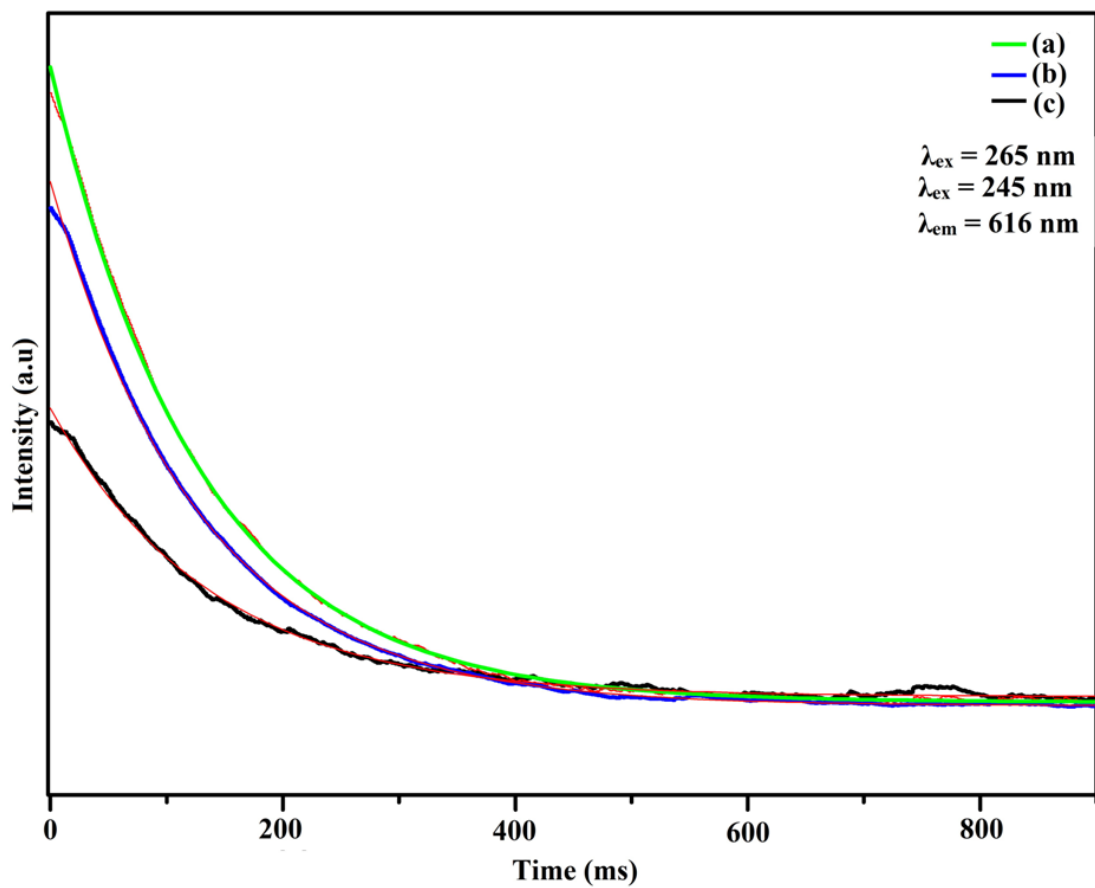

**Figure S13.** Photoluminescence decay curves of NaGdF<sub>4</sub>: Eu<sup>3+</sup>/Ce<sup>3+</sup> in presence of heavy metal ions: (a) Pb<sup>2+</sup>, (b) Cr<sup>3+</sup>, (c) Cd<sup>2+</sup>.

**Table S1.** Atomic and Weight % of elements present in NaGdF<sub>4</sub>:Eu<sup>3+</sup>.

| Elements          | 3 hrs |       | 6hrs  |       | 12 hrs |       | 18 hrs |       | 24 hrs |       |
|-------------------|-------|-------|-------|-------|--------|-------|--------|-------|--------|-------|
|                   | Wt%   | At%   | Wt%   | At%   | Wt%    | At%   | Wt%    | At%   | Wt%    | At%   |
| <b>Gadolinium</b> | 92.24 | 81.49 | 87.61 | 65.80 | 89.23  | 69.95 | 88.74  | 82.45 | 93.73  | 79.24 |
| <b>Europium</b>   | 5.69  | 5.20  | 7.60  | 5.91  | 6.75   | 5.47  | 10.20  | 9.81  | 3.28   | 2.87  |
| <b>Sodium</b>     | 1.44  | 8.70  | 1.41  | 7.27  | 1.37   | 7.36  | 0.33   | 2.07  | 2.51   | 14.49 |
| <b>Fluorine</b>   | 0.63  | 4.61  | 3.38  | 21.03 | 2.65   | 17.22 | 0.74   | 5.68  | 0.48   | 3.39  |

**Table S2.** Atomic and Weight % of elements present in NaGdF<sub>4</sub>:Ce<sup>3+</sup>/Eu<sup>3+</sup>.

| Elements          | 3 hrs |       | 6hrs  |       | 12 hrs |       | 18 hrs |       | 24 hrs |       |
|-------------------|-------|-------|-------|-------|--------|-------|--------|-------|--------|-------|
|                   | Wt%   | At%   | Wt%   | At%   | Wt%    | At%   | Wt%    | At%   | Wt%    | At%   |
| <b>Gadolinium</b> | 86.99 | 72.59 | 84.77 | 61.50 | 87.06  | 62.87 | 87.09  | 83.97 | 15.39  | 2.43  |
| <b>Europium</b>   | 5.33  | 4.60  | 5.01  | 3.76  | 4.16   | 3.11  | 9.06   | 9.04  | 1.38   | 0.23  |
| <b>Cerium</b>     | 4.82  | 4.51  | 4.70  | 3.83  | 3.16   | 2.56  | 3.40   | 3.68  | 1.16   | 0.21  |
| <b>Sodium</b>     | 1.28  | 7.28  | 2.17  | 10.76 | 2.09   | 10.3  | 0.16   | 1.08  | 44.66  | 48.24 |
| <b>Fluorine</b>   | 1.59  | 11.01 | 3.35  | 20.14 | 3.54   | 21.13 | 0.28   | 2.24  | 37.41  | 48.90 |
